# Supplementary material for: New Insight into Time-Temperature Correlation for Polymer Relaxations Ranging from Secondary Relaxation to Terminal Flow: Application of a Universal and Developed WLF Equation
Source: Polymers (Basel). 2017 Nov 2;9(11):567. doi: 10.3390/polym9110567 (PMC6418538; doi:10.3390/polym9110567)
Supplement: Supplementary file 1 [file polymers-09-00567-s001.doc]

**Supporting Information**

**New Insight into Time-Temperature Correlation for Polymer Relaxations Ranging from Secondary Relaxation to Terminal Flow: Application of a Universal and Developed
WLF Equation**

Yonggang Shangguan1[[1]](#footnote-2)*, Feng Chen1, Erwen Jia1, Yu Lin1, Jun Hu2, Qiang Zheng1[[2]](#footnote-3)*

*1MOE Key Laboratory of Macromolecular Synthesis and Functionalization, Department of Polymer Science and Engineering, Zhejiang University, Hangzhou 310027, P. R. China*

*2The Affiliated Stomatology Hospital, College of Medicine, Zhejiang University, Hangzhou, 310006, P. R. China.*

|  |  |
| --- | --- |
|  |  |
|  |  |
|  |  |
|  |  |
|  |  |
|  |  |
|  |  |
|  |  |
|  |  |
|  |  |
|  |  |
|  |  |
|  |  |
|  |  |
| **Figure S1.** Figures for the fitting results by the DWLF equation at different reference temperaturesfor *i*PP. | |

|  |
| --- |
| **Figure S2.** Glass transition temperature investigated by dynamic mechanical analysis (DMA) measurement for *i*PP. |

|  |  |
| --- | --- |
| **Figure S3.** Glass transition temperature investigated by DMA measurement for (**a**) HDPE and  (**b**) LDPE. | |

|  |
| --- |
| **Figure S4.** Glass transition temperature investigated by DMA measurement for EPR. |

|  |
| --- |
| **Figure S5.** Melting curve of *i*PP investigated by DSC. |

|  |
| --- |
| **Figure S6.** Glass transition temperature investigated by DSC measurement for PS. |

|  |
| --- |
| **Figure S7.** Glass transition temperature investigated by DSC measurement for PMMA. |

|  |  |
| --- | --- |
| **Figure S8.** (**a**) DMA result of PVC and (**b**) the β-relaxation process of PVC measured by DMA at different frequencies. | |

|  |
| --- |
| **Figure S9.** Activation energies of PS and PMMA. |

**Mathematical Derivation of Equation (3) and Equation (6)**

The WLF equation and the VFTH equation are in the following form:

(1)

(2)

Since *α*T is the ratio of two relaxation times, which can be expressed as Equation (2), the relaxation times at arbitrary *T* and reference temperature *T*s can be written as:

The shift factor *α*T is equal to the ratio of *τ* and *τs*:

Thus, we can obtain the lg*α*T form of the VFTH equation:

Compared with the WLF form of Equation (1), we can obtain:

(3)

(4)

The Arrhenius form is written as:

(5)

Similar to the lg*α*T form of the VFTH equation, we can obtain the relaxation times at arbitrary *T* and reference temperature *T*s:

Therefore, the lg*α*T form of the Arrhenius equation can be written as:

(6)

1. * Corresponding author, E-mail: [shangguan@zju.edu.cn](mailto:shangguan@zju.edu.cn); [zhengqiang@zju.edu.cn](mailto:zhengqiang@zju.edu.cn) [↑](#footnote-ref-2)
2. * [↑](#footnote-ref-3)
